1 Membrane Fusion can be Driven by Sec18/NSF, Sec17/ $\alpha$ SNAP, and *trans*-SNARE complex  
2 without HOPS

3

4 Hongki Song and William Wickner

5

6 Department of Biochemistry and Cell Biology

7 Geisel School of Medicine at Dartmouth

8 7200 Vail Building, Hanover, NH 03755

9

10

11

12 Correspondence: [Bill.Wickner@Dartmouth.edu](mailto:Bill.Wickner@Dartmouth.edu)

13

14 **Abstract**

15

16 Yeast vacuolar membrane fusion has been reconstituted with R, Qa, Qb, and Qc-family SNAREs,  
17 Sec17/ $\alpha$ SNAP, Sec18/NSF, and the hexameric HOPS complex. HOPS tethers membranes and  
18 catalyzes SNARE assembly into RQaQbQc *trans*-complexes which zipper through their SNARE  
19 domains to promote fusion. Previously, we demonstrated that Sec17 and Sec18 can bypass the  
20 requirement of complete zippering for fusion (Song et al., 2021), but it has been unclear  
21 whether this activity of Sec17 and Sec18 is directly coupled to HOPS. HOPS can be replaced for  
22 fusion by a synthetic tether when the three Q-SNAREs are pre-assembled. We now report that  
23 SNARE zippering-arrested fusion intermediates that are formed without HOPS support  
24 Sec17/Sec18-triggered fusion. This zippering-bypass fusion is thus a direct result of Sec17 and  
25 Sec18 interactions: with each other, with the platform of partially zippered SNAREs, and with  
26 the apposed tethered membranes. As these fusion elements are shared among all exocytic and  
27 endocytic traffic, Sec17 and Sec18 may have a general role in directly promoting fusion.

28

29 Intracellular membrane fusion is catalyzed by protein families which are conserved from yeast  
30 to humans and among the organelles (Wickner and Rizo, 2017). These include Rab-family  
31 GTPases, large tethering complexes which bind to Rabs (Baker and Hughson, 2016), membrane-  
32 anchored SNARE proteins which assemble into *trans*-complexes that bridge membranes before  
33 fusion, and SNARE chaperones of the SM, Sec17/ $\alpha$ SNAP and Sec18/NSF families. Yeast vacuole  
34 fusion combines Rab-effector tethering and SM functions into the large hexameric HOPS  
35 (**h**omotypic fusion and vacuole **p**rotein **s**orting) complex (Wurmser et al., 2000; Seals et al.,  
36 2000; Stroupe et al., 2006). HOPS binds to acidic lipids (Orr et al., 2015) and to its Rab Ypt7 on  
37 each fusion partner membrane (Hickey et al., 2010), activating it (Torng and Wickner, 2020) to  
38 initiate N- to C- directional assembly among the R, Qa, Qb, and Qc SNAREs. Though Sec17 and  
39 Sec18 will block fusion from spontaneously assembled *trans*-SNARE complexes, HOPS confers  
40 resistance to Sec17 interference (Mima et al., 2008). Without Sec17 or Sec18, HOPS-assembled  
41 *trans*-SNARE complexes require complete zippering to induce fusion (Schwartz and Merz,  
42 2009). The ubiquitous chaperones Sec17 and Sec18 will bind to partially zippered SNARE  
43 complexes and use the N-terminal apolar loop on Sec17 to trigger fusion without needing  
44 complete zippering (Schwartz and Merz, 2009; Zick et al., 2015; Schwartz et al., 2017; Song et  
45 al., 2021). Sec17 has direct affinity for HOPS (Song et al., 2021); it has been unclear whether  
46 HOPS is needed for Sec17 and Sec18 to engage partially zippered SNAREs and mediate  
47 zippering-bypass fusion.

48  
49 We now exploit a synthetic tether to show that HOPS is not required for Sec17 and Sec18 to  
50 drive zippering-bypass fusion. The 4 SNAREs, Sec17/ $\alpha$ SNAP, and Sec18/NSF, which are the  
51 fundamental components of the 20s particle (Zhao et al., 2015), suffice to drive fusion. As a  
52 synthetic tether, we employ the dimeric protein glutathione-S-transferase (GST) fused to a PX  
53 domain. Dimeric GST-PX binds PI3P to tether membranes bearing PI3P (Song and Wickner,  
54 2019). When Q-SNAREs are pre-assembled into a QaQbQc ternary complex on one fusion  
55 partner membrane, tethering by GST-PX supports fusion without the need for SM function  
56 (Song and Wickner, 2019). This fusion relies on SNARE zippering, as it is blocked by deletion of  
57 the C-terminal region of the Qc SNARE domain, the Qc3 $\Delta$  mutation (Schwartz and Merz, 2009;  
58 Song and Wickner, 2019). We find that GST-PX tethered membranes bearing R and QaQbQc3 $\Delta$   
59 SNAREs on fusion partners, unable to completely zipper and fuse because of the shortened Qc  
60 SNARE domain, are rescued from this arrested state and will fuse upon addition of Sec17 and  
61 Sec18. Thus the Sec17 and Sec18 fusion functions do not rely on interactions with HOPS,  
62 instead acting through their interactions with each other, with tethered membranes, and with a  
63 partially-zippered *trans*-SNARE binding platform.

64

## 65 Results

66

67 Proteoliposomes were prepared with vacuolar lipids, with membrane anchored Ypt7, and with  
68 either the R- or the 3Q-SNAREs. The Qc SNARE was either wild-type with its full-length SNARE  
69 domain or Qc3 $\Delta$  which lacks the C-terminal 4 heptads of its SNARE domain. The Ypt7/R- and  
70 Ypt7/3Q- proteoliposomes bore luminal fusion-reporter fluorescent proteins, either Cy5-  
71 labeled streptavidin or biotinylated phycoerythrin (Figure 1A). Proteoliposomes were purified  
72 by flotation to remove unincorporated proteins. When these proteoliposomes are mixed, their  
73 luminal fluorescent proteins are separated by at least the thickness of two lipid bilayers, too far  
74 for measurable fluorescence resonance energy transfer (FRET). Upon fusion and the attendant  
75 content mixing, the binding of biotin to streptavidin brings the Cy5 and phycoerythrin  
76 fluorophores into intimate contact, yielding a strong FRET signal (Zucchi and Zick, 2011). Fusion  
77 incubations were performed with mixed Ypt7/R and Ypt7/3Q proteoliposomes and with  
78 external nonfluorescent streptavidin to block any signal from proteoliposome lysis. Each  
79 incubation had either HOPS or GST-PX to tether the membranes (Figure 1A). Also present from  
80 the start were either a) buffer alone, b) Sec17, c) Sec18 and ATP $\gamma$ S, or d) both Sec17 and  
81 Sec18/ATP $\gamma$ S. Fusion was monitored by FRET between the luminal probes; the initial rate  
82 during the first 5 minutes is termed the  $\alpha$  portion in Figures 1B-E. At 30 minutes, each reaction  
83 received a supplement of the components not added at time 0, i.e. a) Sec17, Sec18 and ATP $\gamma$ S,  
84 b) Sec18 and ATP $\gamma$ S, c) Sec17, or d) buffer alone, so that all incubations had Sec17, Sec18, and  
85 ATP $\gamma$ S as the incubation continued in the  $\beta$  portion of the experiment (Fig1B $\beta$ -E $\beta$ ), from 30  
86 minutes to 32 minutes. Distinct information can be gleaned from the  $\alpha$  and  $\beta$  intervals of the  
87 experiment, and these are considered in turn below.

88

89 **HOPS is not required for Sec17/Sec18 stimulation of fusion.** When the 3Q complex includes  
90 wild-type full-length Qc, HOPS-mediated fusion (Figure 1B $\alpha$ , black curve) shows only minor  
91 effects from adding either Sec17 (red), Sec18 with a nonhydrolyzable ATP analog (blue), or  
92 Sec17, Sec18, and ATP $\gamma$ S (green). In contrast, when the 3Q complex includes Qc3 $\Delta$  to arrest  
93 SNARE zippering and block fusion (Figure 1C $\alpha$ , black curve), both Sec17 and Sec18 are required  
94 to bypass the zippering-arrest and allow fusion (Figure 1C $\alpha$ , contrast the green curve vs the  
95 blue, red or black curves).

96

97 The dimeric tether GST-PX (Song and Wickner, 2019) also supports fusion with pre-assembled  
98 wild-type Q-SNAREs (Figure 1D $\alpha$ , black curve), but this fusion is blocked by Sec17 (Figure 1D $\alpha$ ,  
99 red curve) without rescue by Sec18 (green curve). When fusion with the dimeric GST-PX tether  
100 is blocked by the Qc3 $\Delta$  mutation (Figure 1E $\alpha$ , black curve), there is no rescue by Sec17, alone or  
101 in combination with Sec18/ATP $\gamma$ S (Figure 1E $\alpha$ , red and green curves), since HOPS is the only  
102 tether which bypasses inhibition by Sec17 (Song and Wickner, 2019).

103

104 At the end of these 30 minute incubations, each reaction received a further addition of any  
105 components not added at time 0. After this addition, each incubation had Sec17, Sec18, and  
106 ATP $\gamma$ S. Fusion incubations continued in the  $\beta$  portion of the experiment, from 30 minutes to 32  
107 minutes, and beyond. Although full-length SNAREs support zippering and fusion with either the

108 HOPS or GST-PX tether, a kinetic intermediate accumulates which gives some additional fusion  
109 upon addition of Sec17/Sec18/ATP $\gamma$ S (Figure 1, B $\beta$  and D $\beta$ , black curves). When SNARE  
110 zippering and the attendant fusion was blocked by the Qc3 $\Delta$  mutation, HOPS-dependent  
111 zippering-bypass fusion requires Sec17, Sec18, and ATP $\gamma$ S (Figure 1C $\alpha$ ), as reported (Song et al.,  
112 2020; 2021). In their absence, fusion intermediate accumulated, since there is rapid fusion  
113 upon their addition (Figure 1C $\beta$ , curves a-c). Strikingly, though the presence of Sec17 from the  
114 start of the incubation blocks the formation of rapid-fusion intermediate with the GST-PX tether  
115 (Figure 1E $\beta$ , red curve), rapid-fusion intermediate does accumulate with the GST-PX tether  
116 when Sec17 is absent, as Sec17 addition at 30minutes triggers fusion (Figure 1E $\beta$ , curves a and  
117 c). Replicates of this experiment were quantified for the fusion rate during the  $\alpha$  and  $\beta$  intervals  
118 (Figure 1F). Inhibition by Sec17 with the GST-PX tether instead of HOPS is only seen when  
119 Sec17 is present from the start of the incubation, prior to *trans*-SNARE assembly (Figure 1E, red  
120 curve b and green curve d), but once membranes have undergone tethering and *trans*-SNARE  
121 assembly, Sec17 and Sec18 support zippering-bypass fusion without HOPS (Figure 1E $\beta$ , blue and  
122 black curves).  
123

## 124 Discussion

125

126 Sec17 has direct affinity for SNAREs and can inhibit fusion of the organelle (Wang et al., 2000)  
127 or block fusion of reconstituted proteoliposomes without HOPS (Mima et al., 2008). HOPS  
128 engages each of the 4 SNAREs (Stroupe et al., 2006; Baker et al., 2015; Song et al., 2020) and  
129 catalyzes their assembly (Baker et al., 2015; Orr et al., 2017; Jiao et al., 2018; Song et al., 2020)  
130 in a manner which renders fusion relatively resistant to Sec17 (Mima et al., 2008; Song and  
131 Wickner, 2019). Excessive Sec17 blocks the initial stages of fusion while stimulating fusion when  
132 added after *trans*-SNARE assembly (Zick et al., 2015). With the synthetic tether GST-PX, Sec17  
133 which interacts with SNAREs before they assemble into *trans*-complexes inhibits the  
134 subsequent fusion (Song and Wickner, 2019). We now show that once fusion intermediates of  
135 *trans*-SNARE complexes have formed, Sec17 and Sec18 will promote efficient zippering-bypass  
136 fusion whether tethering is by HOPS or by the synthetic tether GST-PX (Figure 1C $\beta$  and E $\beta$ ).

137

138 HOPS serves both as a tether (Hickey et al., 2010) and catalyst to initiate SNARE assembly  
139 (Baker et al., 2015), but it has been unclear whether it catalyzes the later stages of zippering or  
140 is needed for Sec17/Sec18-induced fusion without zippering. The engagement of SNAREs by  
141 HOPS (Stroupe et al., 2006; Baker et al., 2015; Song et al., 2020) largely bypasses Sec17  
142 inhibition. Once SNAREs are partially zippered in *trans*, Sec17 and Sec18 do not need HOPS to  
143 support the completion of fusion. The completion of SNARE zippering is promoted by Sec17  
144 (Song et al., 2021), and Sec17 displaces HOPS from SNARE complexes (Collins et al., 2005;  
145 Schwartz et al., 2017). The interactions among the SNAREs, Sec17/ $\alpha$ SNAP and Sec18/NSF are  
146 seen at a molecular level in the 20s complex, consisting of a 4-SNARE coiled coil anchored to  
147 membranes at their C-termini, surrounded by up to 4 Sec17/ $\alpha$ SNAP molecules, and all capped  
148 at the membrane-distal end by Sec18/NSF (Zhao, 2015). A "*trans*-20s" (Song et al., 2021; Rizo  
149 et al., 2021) may generally drive fusion, since its elements are common to all exocytic and  
150 endocytic trafficking while the tethering complexes of other organelles are varied and often do  
151 not have the organelle's SM protein as a tightly-bound subunit like Vps33 is in HOPS (Baker and  
152 Hughson, 2016). These findings support the model (Song et al., 2021) that HOPS only acts for  
153 tethering and to catalyze the initial phase of zippering in a Sec17-resistant manner. HOPS is  
154 specific for fusion at the vacuole/lysosome, but Sec17/ $\alpha$ SNAP, Sec18/NSF, and SNAREs are  
155 general elements of exocytic and endocytic vesicular trafficking. Our current findings suggest  
156 that Sec17 and Sec18 support of zippering-bypass fusion may not be restricted to the  
157 vacuole/lysosome, but may broadly contribute to many SNARE-mediated fusion events.

158

159 **Methods**

160

161 Reagents were purchased, and proteins purified, as described in Song et al., 2021.

162

163 **GST-PX constructions.**

164 DNA encoding the PX domain from the Qc SNARE Vam7 (Amino acyl residues 2-123) was  
165 amplified by PCR with CloneAMP HiFi PCR premix (Takara Bio USA, Mountain View, CA, USA).  
166 The amplified DNA fragment was cloned into BamHI and Sall digested pGST parallel1 vector  
167 (Sheffield et al.,1999) with an NEBuilder HiFi DNA Assembly kit (NEB, Ipswich, MA, USA).

168

169 For GST-PX

170 F AGGGCGCCATGGATCCGGCAGCTAATTCTGTAGGGAA

171 R AGTTGAGCTCGTCTCGACTATGGCTTTGACAACTGCAGGA

172

173 GST-PX was prepared as described (Fratti and Wickner, 2007).

174

175 Proteoliposome preparation and fusion assays were as described in Song et al. (2021). In brief,  
176 proteoliposomes were separately preincubated for 10 min at 27°C with EDTA and GTP, followed  
177 by addition of MgCl<sub>2</sub>, to load the Ypt7 with GTP. After separate preincubation for 10min at  
178 27°C of both proteoliposome preparations and of mixtures of all soluble proteins (HOPS, GST-  
179 PX, Sec17, and Sec18/ATP $\gamma$ S) empty assay wells received in rapid succession 5 $\mu$ l of Ypt7/R  
180 proteoliposomes, 5 $\mu$ l of Ypt7/3Q proteoliposomes, and an 8 $\mu$ l mixture of all soluble  
181 components. FRET representing fusion was recorded each minute for 30 min, as described  
182 (Song et al., 2021), then the multiwell plate was withdrawn and 2 $\mu$ l of buffer, Sec17, Sec18, or a  
183 mixture of Sec17, Sec18, and Mg:ATP $\gamma$ S was added and the plate returned to the machine in  
184 time for the 31 minute time-point and those thereafter.

185

186

187 Acknowledgements. We thank Amy Orr for expert technical assistance. This work was  
188 supported by NIGMS grant R35GM118037.  
189



190 **References**

191

192 Baker, R.W., Jeffrey, P.D., Zick, M., Phillips, B.P, Wickner, W.T., and Hughson, F.M. (2015) A  
193 direct role for the Sec1/Munc18-family protein Vps33 as a template for SNARE assembly.  
194 *Science* 349, 1111-1114

195

196 Baker, R.W. and Hughson, F.M. (2016) Chaperoning SNARE assembly and disassembly. *Nat. Rev.*  
197 *Mol. Cell Biol.* 17, 465-479

198

199 Collins, K.M., Thorngren, N.L., Fratti, R.A., and Wickner, W.T. (2005) Sec17p and HOPS, in  
200 distinct SNARE complexes, mediate SNARE complex disruption or assembly for fusion. *EMBO J.*  
201 24, 1775-1786.

202

203 Fratti, R. and Wickner, W. (2007) Distinct targeting and fusion functions of the PX and SNARE  
204 domains of yeast vacuolar Vam7p. *J. Biol. Chem.* 282, 13133-13138

205

206 Hickey, C.M. and Wickner, W. (2010) HOPS initiates vacuole docking by tethering membranes  
207 before trans-SNARE complex assembly. *Mol. Biol. Cell* 21, 2297-2305.

208

209 Jiao, J., He, M., Port, S.A., Baker, R.W., Xu, Y., Qu, H., Xiong, Y., Wang, Y., Jin, H., Eisemann, T.J.,  
210 Hughson, F.M., and Zhang, Y. (2018) Munc18-1 catalyzes neuronal SNARE assembly by  
211 templating SNARE association. *eLife* DOI: <https://doi.org/10.7554/eLife.41771>.

212

213 Mima, J., Hickey, C.M., Xu, H., Jun, Y., and Wickner, W. (2008) Reconstituted membrane fusion  
214 requires regulatory lipids, SNAREs, and synergistic SNARE chaperones. *EMBO J.* 27, 2031-2042.

215

216 Orr, A., Wickner, W., Rusin, S.F., Kettenbach, A.N., Zick, M. (2015) Yeast vacuolar HOPS,  
217 regulated by its kinase, exploits its affinities for acidic lipids and Rab:GTP for membrane binding  
218 and to catalyze tethering and fusion. *Mol. Biol. Cell* 26, 305-315.

219

220 Orr, A., Song, H., Rusin, S.F., Kettenbach, A.N., and Wickner, W. (2017) HOPS catalyzes the  
221 interdependent assembly of each vacuolar SNARE into a SNARE complex. *Mol. Biol. Cell* 28, 975-  
222 983.

223

224 Rizo, J., Jaczynska, K., and Stepien, K.P. (2021) Molecular machinery turns full circle. *eLife* DOI:  
225 <https://doi.org/10.7554/eLife.70298>.

226

227 Sheffield P, Garrard S, Derewenda Z (1999) Overcoming Expression and Purification Problems of  
228 RhoGDI Using a Family of "Parallel" Expression Vectors. *Prot. Express. Pur.* 15: 34–39.

229

230 Schwartz, M.L. and Merz, A.J. (2009) Capture and release of partially zipped trans-SNARE  
231 complexes on intact organelles. *J. Cell Biol.* 185, 535-549.

232

233 Schwartz, M.L., Nickerson, D.P., Lobingier, B.T., Plemel, R.L., Duan, M., Angers, C.G., Zick, M.,  
234 and Merz, A. (2017) Sec17 ( $\alpha$ -SNAP) and an SM-tethering complex regulate the outcome of  
235 SNARE zippering in vitro and in vivo. eLife DOI: <https://doi.org/10.7554/eLife.27396.001>  
236

237 Seals, D., Eitzen, G., Margolis, N., Wickner, W., and Price, A. (2000) A Ypt/Rab effector complex  
238 containing the Sec1 homolog Vps33p is required for homotypic vacuole fusion. Proc. Natl. Acad.  
239 Sci. USA 97, 9402-9407.  
240

241 Song, H. and Wickner, W. (2019) Tethering guides fusion-competent trans-SNARE assembly.  
242 Proc. Natl. Acad. Sci. USA 116, 13952-7. DOI 10.1073/pnas1907640116.  
243

244 Song, H., Orr, A.S., Lee, M., Harner, M., and Wickner, W.T. (2020) HOPS recognizes each SNARE,  
245 assembling ternary *trans*-complexes for rapid fusion upon engagement with the 4th SNARE.  
246 eLife DOI: <https://doi.org/10.7554/eLife53559>.  
247

248 Song, H., Torng, T.L., Orr, A.S., Brunger, A.T., and Wickner, W.T. (2021) Sec17/Sec18 can support  
249 membrane fusion without help from completion of SNARE zippering. eLife DOI  
250 <https://doi.org/10.7554/eLife.67578>.  
251

252 Stroupe, C., Collins, K.M., Fratti, R.A., and Wickner, W. (2006) Purification of active HOPS  
253 complex reveals its affinities for phosphoinositides and the SNARE Vam7p. EMBO J. 25, 1579-  
254 1589.  
255

256 Wang, L., Ungermann, C., and Wickner, W. (2000) The docking of primed vacuoles can be  
257 reversibly arrested by Sec17 ( $\alpha$ -SNAP). J. Biol. Chem. 275, 22862-22867.  
258

259 Wickner, W., Rizo, J. (2017) A cascade of multiple proteins and lipids catalyzes membrane  
260 fusion. Mol. Biol. Cell 28, 707-711.  
261

262 Wurmser, A.E., Sato, T.K., and Emr, S.D. (2000) New Component of the vacuolar class C-Vps  
263 complex couples nucleotide exchange on the Ypt7 GTPase to SNARE-dependent docking and  
264 fusion. J. Cell Biol. 151, 551-562.  
265

266 Zhao, M., Wu, S., Zhou, Q., Vivona, S., Cipriano, D.J., Cheng, Y., and Brunger, A.T. (2015)  
267 Mechanistic insights into the recycling machine of the SNARE complex. Nature 518, 61-67. DOI  
268 10.1038/nature 14148.  
269

270 Zick, M., Stroupe, C., Orr, A., Douville, D., and Wickner, W. (2014) Membranes linked by trans-  
271 SNARE complexes require lipids prone to non-bilayer structure for progression to fusion. eLife  
272 DOI: 10.7554/eLife.01879.  
273

274 Zick, M., Orr, A., Schwartz, M.L., Merz, A.J., and Wickner, W.T. (2015) Sec17 can trigger fusion of  
275 trans-SNARE paired membranes without Sec18. Proc. Natl. Acad. Sci. USA, 112, E2290-E2297.  
276

277

278 **Figure legend**

279

280 **Figure 1.** Sec17, Sec18, and ATP $\gamma$ S promote rapid and HOPS-independent fusion without SNARE  
281 zippering. Proteoliposomes were prepared with vacuolar lipids, membrane-anchored Ypt7, and  
282 either R or the 3 Q-SNAREs with molar ratios of 1Ypt7:8,000 lipids and 1 of each SNARE/16,000  
283 lipids. Since Qc3 $\Delta$  is a labile member of SNARE complexes (Song et al., 2021), we used a 5-fold  
284 molar excess to the other SNAREs in preparing Ypt7/QaQbQc3 $\Delta$  proteoliposomes. The initial  
285 mixtures at t=0 were 18  $\mu$ l, and remaining components were added at 30min in 2 $\mu$ l. A vertical  
286 bar separates the first 30min, termed  $\alpha$ , and the 2-minute  $\beta$  interval after further additions.  
287 Experiments were repeated in quintuplicate; mean values and standard deviations are shown.  
288

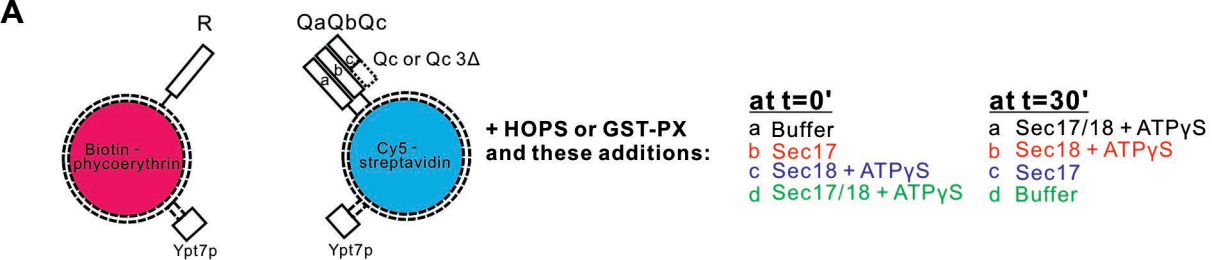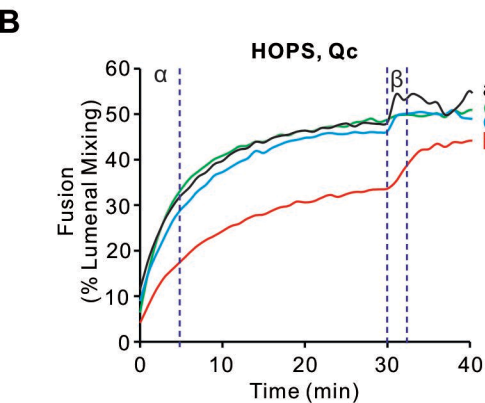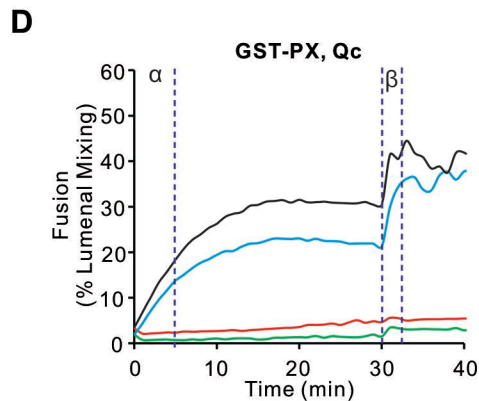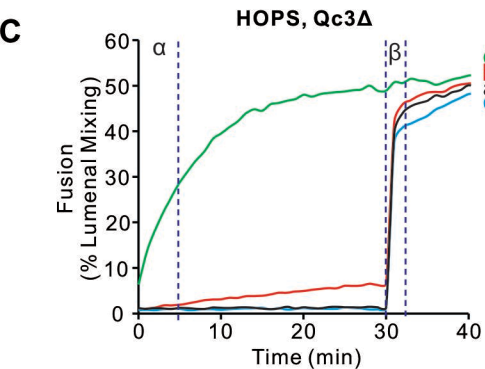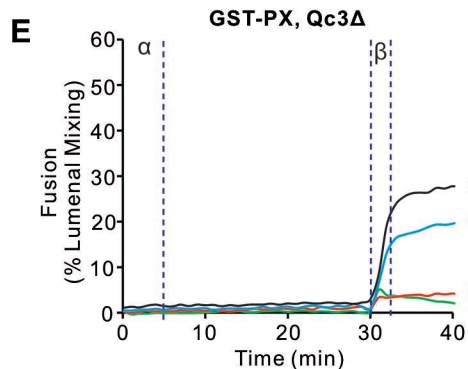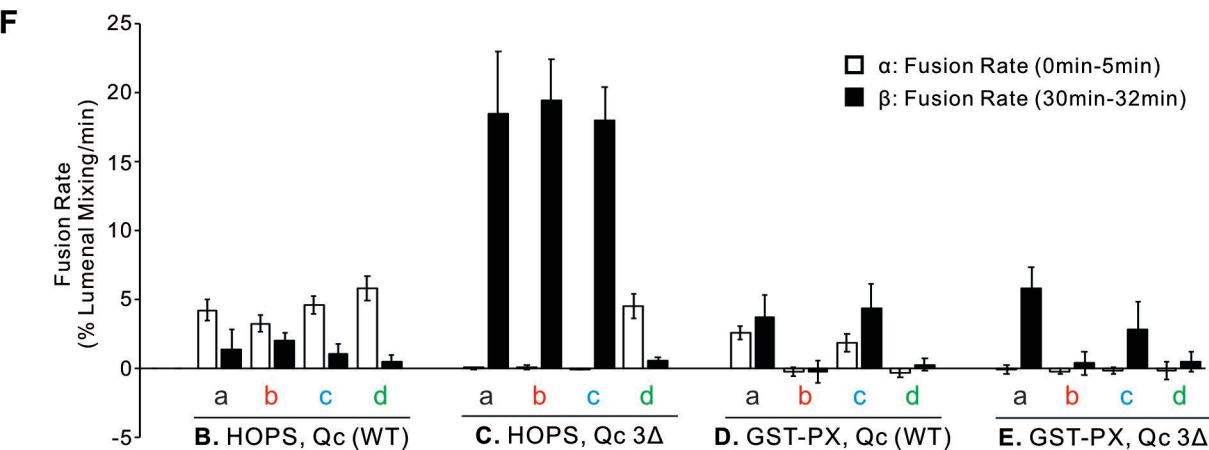

Source: https://www.biorxiv.org/content/10.1101/2021.08.06.455435v1.full.pdf
